# Supplementary material for: Periodic mesoporous titania with anatase and bronze phases – the new generation photocatalyst: synthesis, characterisation, and application in environmental remediation
Source: Royal Society of Chemistry journal article supplement (doi:10.1039/d0nj02457k), 2020-01-01
Supplement: d0nj02457k1.pdf [file d0nj02457k1.pdf]

## Electronic Supporting Information (ESI)

### **Periodic Mesoporous Titania with Anatase and Bronze Phases - The New Generation Photocatalyst: Synthesis, Characterisation and Application in Environmental Remediation**

Surya Kumar Vatti<sup>a†</sup>, Sanjeev Gupta<sup>a†</sup>, Rayappan Pavul Raj<sup>a</sup> and Parasuraman Selvam<sup>a,b,c,d\*</sup>

*<sup>a</sup>National Centre For Catalysis Research and Department of Chemistry,  
Indian Institute of Technology-Madras, Chennai 600036, India*

*<sup>b</sup>School of Chemical Engineering and Analytical Science,  
The University of Manchester, Manchester M13 9PL, United Kingdom*

*<sup>c</sup>Department of Chemical and Process Engineering  
University of Surrey, Guildford, Surrey GU2 7XH, United Kingdom*

*<sup>d</sup>Department of Chemistry, Faculty of Advanced Science and Technology,  
Kumamoto University, 2-39-1 Kurokami, Chuo-ku, Kumamoto 860-8555, Japan*

\*Corresponding Author.

Tel.: +91 -44-2257-4235/4200

E-mail: selvam@iitm.ac.in

#### **This PDF file includes:**

**ESI Calibration of HPLC, S1**

**ESI Calibration of UV-Vis spectra, S2**

**ESI Figures, S1-S7**

**ESI Table S1**

## **S1. Calibration of HPLC for estimation of famotidine**

HPLC was calibrated by preparing different concentrations (10 to 100 ppm) of famotidine (FAM) in distilled water. FAM exhibits two absorption peaks due to  $\pi \rightarrow \pi^*$  and  $n \rightarrow \pi^*$  transitions (Figure S4). The mobile phase employed was 7% methanol to 93% Mili-Q water with 0.2% formic acid. The eluent flow was 1 mL/min with oven temperature at 35°C and the wavelength of detection was 266 nm, and the FAM eludes at 10 min. The linear response of the detector for FAM peak area was observed at five different concentrations ranging from 10 to 100 ppm. The Calibration plot was linear in the study range with a correlation coefficient of 0.999, and the equation of regression analysis:  $y = 32989x + 24618$  (see Figure S5).

## **S2. Calibration of UV-Vis spectra for estimation of 4-chlorophenol**

UV-VIS spectra were calibrated by preparing different concentrations (5 to 40 ppm) of 4-chlorophenol (4-CP) in distilled water. 4-CP exhibits two absorption peaks due to  $\pi \rightarrow \pi^*$  and  $n \rightarrow \pi^*$  transitions (see Figure S6). The absorbance at  $\lambda_{\max} = 225$  nm was chosen for the calibration plot and the concentration of samples generated during degradation experiments was calculated from linear plot of the calibration plot with a correlation coefficient of 0.997, and the equation of the regression analysis:  $y = 0.047x + 0.116$  (see Figure S7).

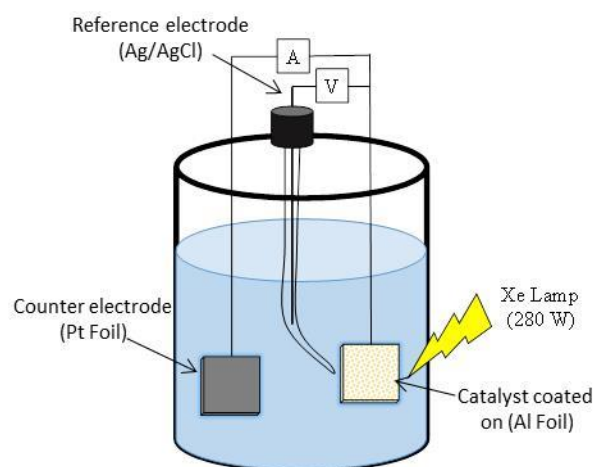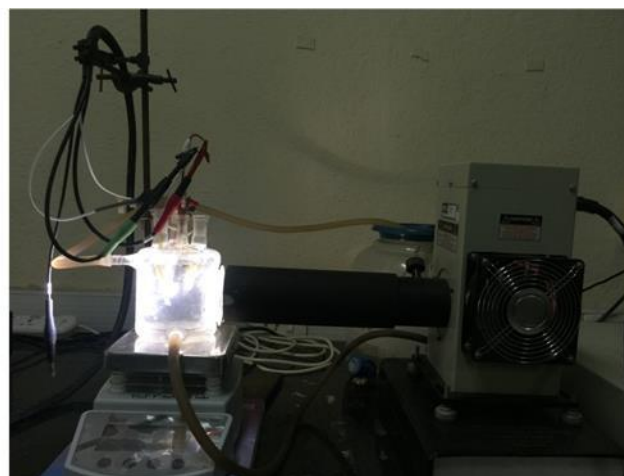

**Figure S1.** Photo-electrochemical reactor set-up: (a) Schematic; (b) Experimental system.

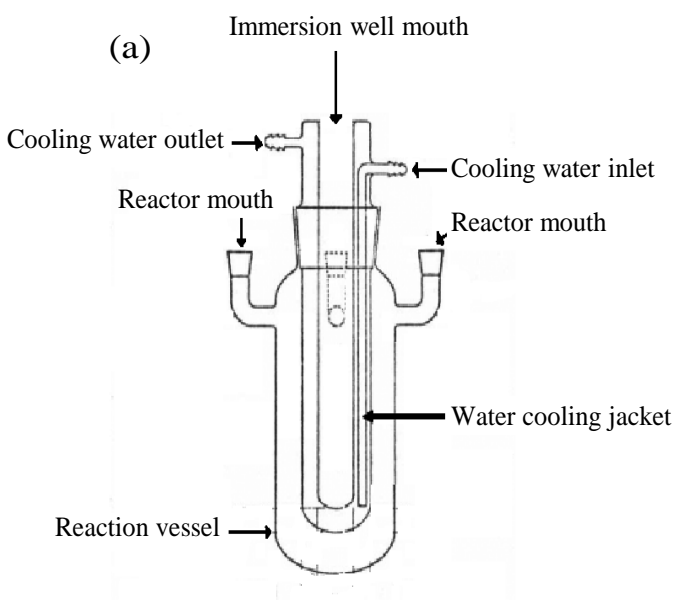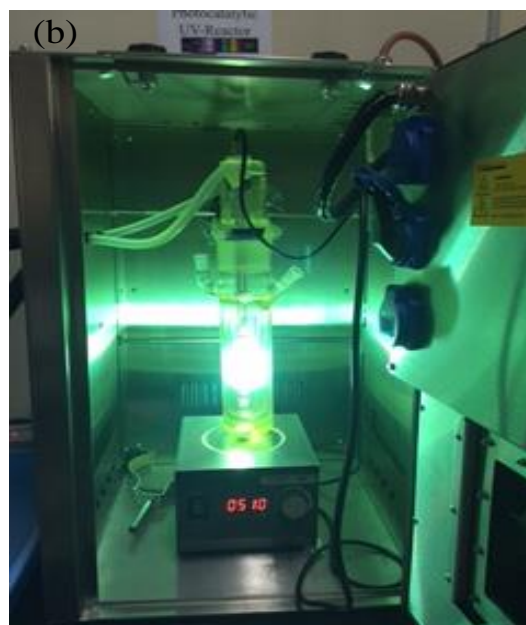

**Figure S2.** Photocatalytic reactor set-up: (a) Schematic; (b) Working reactor system in a UV-protective cabinet.

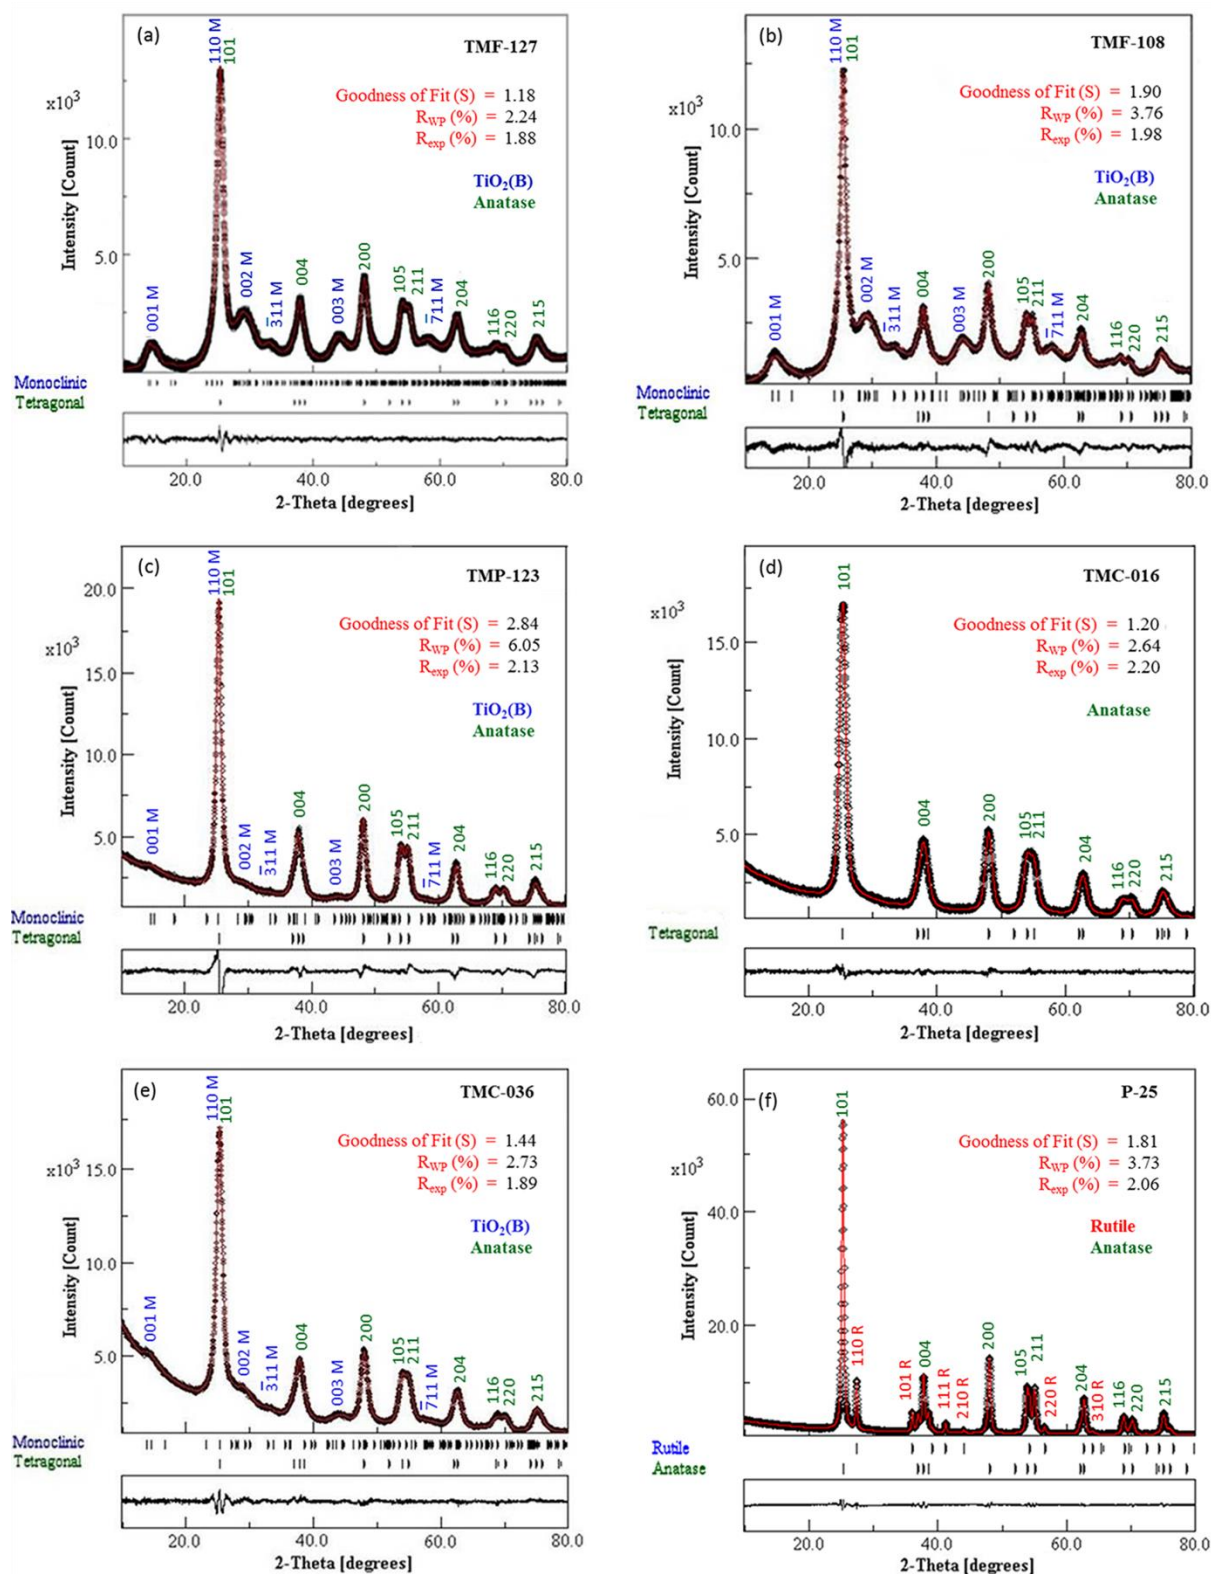

**Figure S3.** The Rietveld refined experimental, calculated and difference XRD patterns of: (a) TMF-127; (b) TMF-108; (c) TMP-123; (d) TMC-016; (e) TMC-036; (f) P-25. The vertical lines indicate the Bragg positions of the different phases.

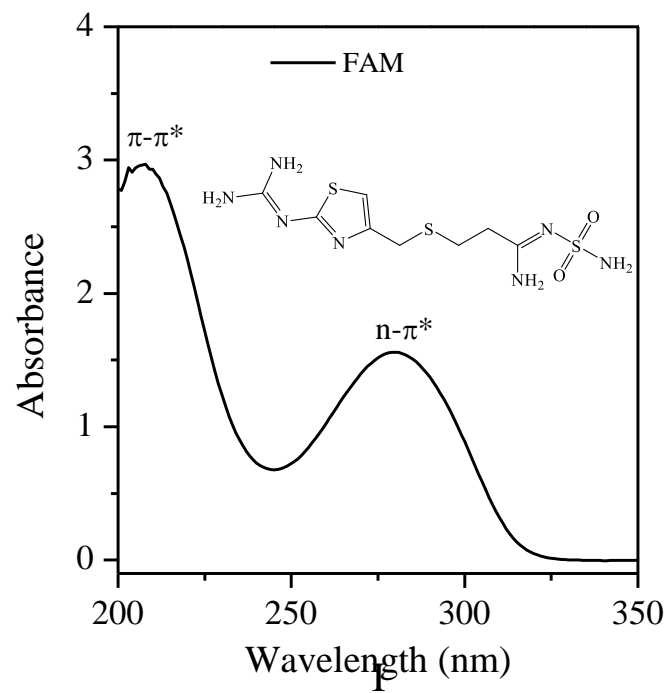

**Figure S4 .** UV-VIS spectrum of famotidine.

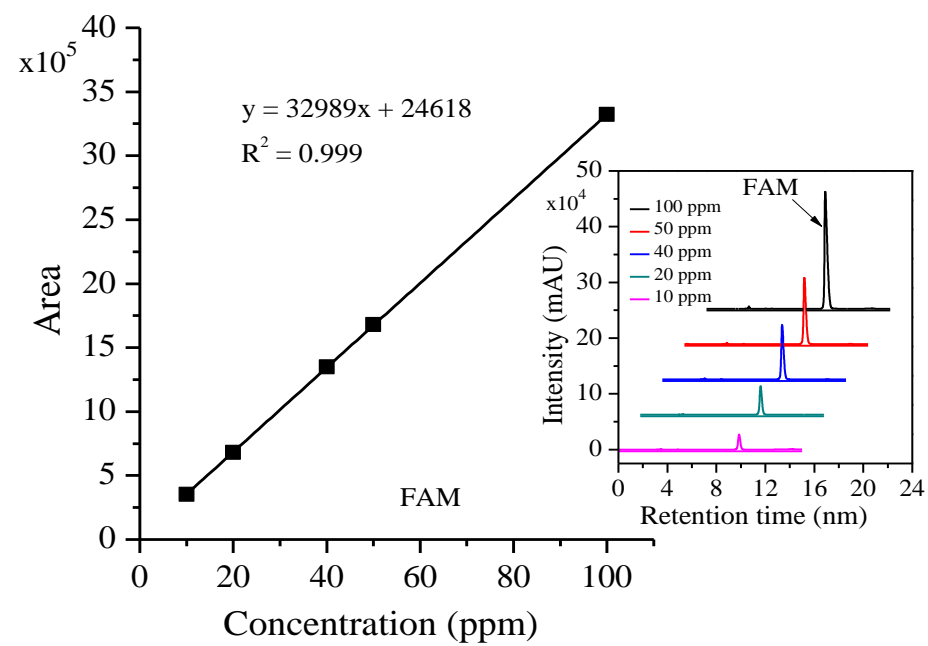

**Figure S5.** HPLC profile and calibration plot of FAM for quantitative analysis.

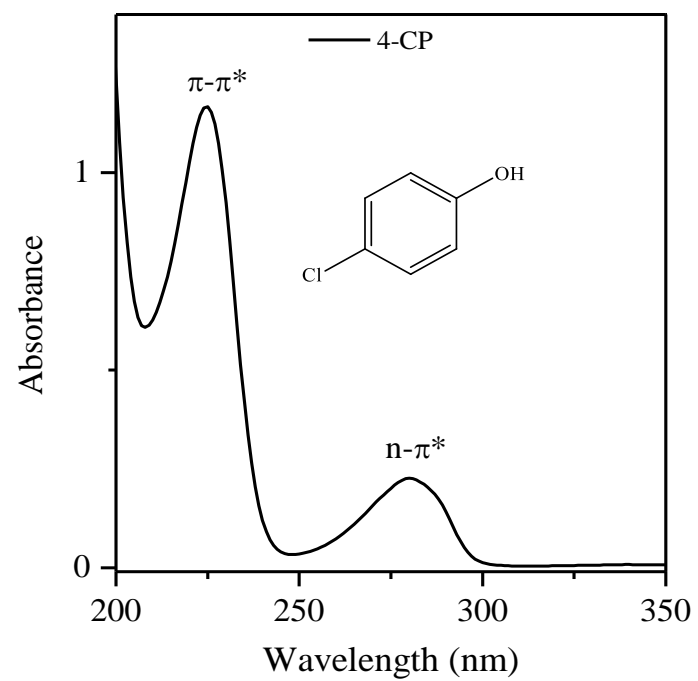

**Figure S6 .** UV-VIS spectrum of 4-chlorophenol.

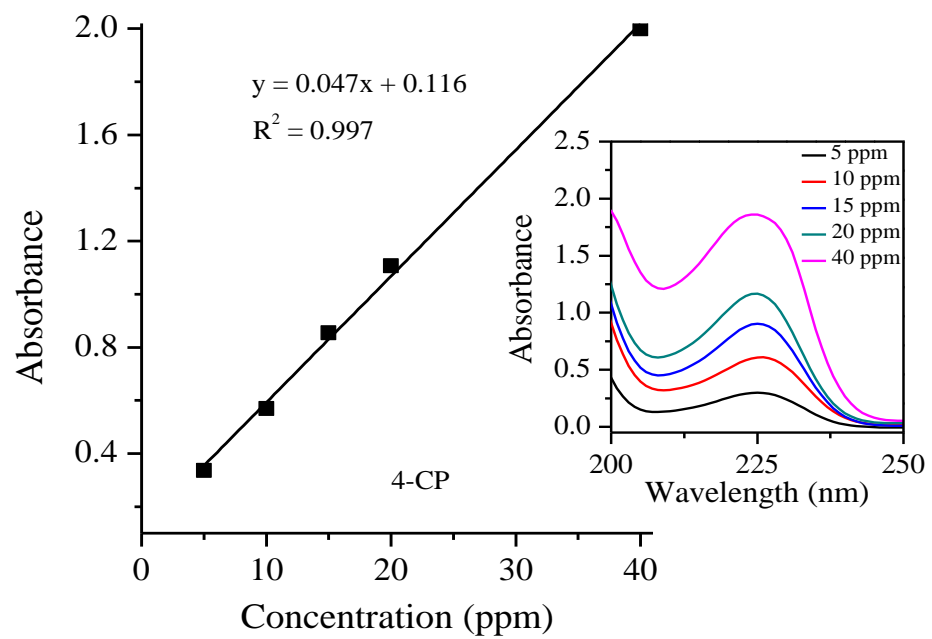

**Figure S7.** UV spectra and calibration plot of 4-CP for quantitative analysis.



Table S1. Observed room temperature Raman spectral frequencies ( $\text{cm}^{-1}$ ) and their assignment for various titania samples.<sup>1-5</sup>

| Material | TiO <sub>2</sub> - Anatase <sup>†</sup> |          |             |                 |          |                        | TiO <sub>2</sub> - Bronze |          |          |          |          |          |          | TiO <sub>2</sub> - Rutile <sup>§</sup> |          |
|----------|-----------------------------------------|----------|-------------|-----------------|----------|------------------------|---------------------------|----------|----------|----------|----------|----------|----------|----------------------------------------|----------|
|          | $E_g(1)$                                | $E_g(2)$ | $B_{1g}(1)$ | $A_{1g}+B_{1g}$ | $E_g(3)$ | $B_{1g}(1)^{\ddagger}$ | $B_g(1)$                  | $A_g(1)$ | $B_g(2)$ | $B_g(3)$ | $A_g(2)$ | $A_g(3)$ | $A_g(4)$ | $E_g$                                  | $A_{1g}$ |
| TMF-127  | 146                                     | 198      | 398         | 517             | 638      | 796                    | 126                       | 145      | 199      | 248      | 365      | 475      | 665      | --                                     | --       |
| TMF-108  | 144                                     | 196      | 397         | 517             | 637      | 796                    | 124                       | 143      | 197      | 247      | 362      | 474      | 665      | --                                     | --       |
| TMP-123  | 145                                     | 196      | 397         | 517             | 639      | 793                    | 124                       | 144      | 198      | 247      | 365      | 474      | 663      | --                                     | --       |
| TMC-016  | 145                                     | 198      | 396         | 516             | 639      | 792                    | --                        | --       | --       | --       | --       | --       | --       | --                                     | --       |
| TMC-036  | 145                                     | 198      | 398         | 516             | 638      | 798                    | 124                       | 143      | 199      | 248      | 366      | 473      | 663      | --                                     | --       |
| P-25     | 147                                     | 197      | 397         | 517             | 637      | 796                    | --                        | --       | --       | --       | --       | --       | --       | 447                                    | 605      |

<sup>†</sup>At low temperature (73 K), the Raman band occurring at  $516 \text{ cm}^{-1}$  (298 K) is split into two bands centered at  $513$  and  $519 \text{ cm}^{-1}$ , and are assigned to  $A_{1g}$  and  $B_{1g(2)}$  modes, respectively.

<sup>‡</sup>First overtone mode of  $B_{1g}(1)$  mode.

<sup>§</sup>At room temperature, the rutile structure exhibits four first order Raman active modes,<sup>2</sup> i.e.,  $B_{1g}$  ( $144 \text{ cm}^{-1}$ ),  $E_g$  ( $448 \text{ cm}^{-1}$ ),  $A_{1g}$  ( $612 \text{ cm}^{-1}$ ) and  $B_{2g}$  ( $827 \text{ cm}^{-1}$ ). Since the scattering intensity of the  $B_{2g}$  mode is very weak while the  $B_{1g}$  mode is relatively weak and overlaps to that of the  $E_g$  ( $147 \text{ cm}^{-1}$ ) strong mode in anatase, they are not visible in the recorded spectra.

## References

1. T. Ohsaka, F. Izumi and Y. Fujiki, *J. Raman Spectrosc.*, 1978, **7**, 321.
2. U. Balachandran and N.G. Error, *J. Solid State Chem.*, 1982, **42**, 276.
3. T.D. Robert, L.D. Laude, V.M. Geskin, R. Lazzaroni, and R. Gouttebaron, *R. Thin Sol. Films*, 2003, **440**, 268.
4. M.B. Yahia, F. Lemoigno, T. Beuvier, J.-S. Filhol, M. Richard-Plouet, L. Brohan and M.-L. Doublet, *J. Chem. Phys.*, 2009, **130**, 204501.
5. T. Beuvier, M. Richard-Plouet and L. Brohan, *J. Phys. Chem. C*, 2009, **113**, 13703.
